# Supplementary material for: A Sillén oxyhalide SrBi3O4Cl3 as a promising photocatalyst for water splitting: impact of the asymmetric structure on light absorption and charge carrier dynamics
Source: Royal Society of Chemistry journal article supplement (doi:10.1039/d3ta00906h), 2023-01-01
Supplement: d3ta00906h1.pdf [file d3ta00906h1.pdf]

## *Supporting Information*

# **A Sillén Oxyhalide $\text{SrBi}_3\text{O}_4\text{Cl}_3$ as a Promising Photocatalyst for Water Splitting: Impact of the Asymmetric Structure on Light Absorption and Charge Carrier Dynamics**

Hajime Suzuki,<sup>a</sup> Daichi Ozaki,<sup>a</sup> Yusuke Ishii,<sup>a</sup> Osamu Tomita,<sup>a</sup> Daichi Kato,<sup>a</sup> Shunsuke Nozawa,<sup>b</sup> Kouichi Nakashima,<sup>c</sup> Akinori Saeki,<sup>d</sup> Hiroshi Kageyama,<sup>a</sup> Ryu Abe<sup>a,\*</sup>

- a. Department of Energy and Hydrocarbon Chemistry, Graduate School of Engineering, Kyoto University, Nishikyo-ku, Kyoto 615-8510, Japan
- b. Photon Factory (PF), Institute of Materials Structure Science (IMSS), High Energy Accelerator Research Organization (KEK), Tsukuba, Ibaraki 305-0801, Japan
- c. Department of Materials Science and Engineering, Graduate School of Science and Engineering, Ibaraki University, 4-12-1, Nakanarusawa, Hitachi, Ibaraki 316-8511, Japan
- d. Department of Applied Chemistry, Graduate School of Engineering, Osaka University, 2-1 Yamadaoka, Suita, Osaka 565-0871, Japan

† H. S. and D. O. contributed equally to this work.

**Table S1** Final refined structure parameters for SrBi<sub>3</sub>O<sub>4</sub>Cl<sub>3</sub><sup>a</sup>

| Atom   | Site       | <i>x</i> | <i>y</i> | <i>z</i>                        | <i>g</i>                      | 100 <i>U</i> / Å <sup>2</sup> |
|--------|------------|----------|----------|---------------------------------|-------------------------------|-------------------------------|
| Bi/Sr2 | 4 <i>e</i> | 0        | 0        | Bi: 0.3432(10)<br>Sr: 0.3287(3) | Bi: 0.528(2)<br>Sr: 0.472 (2) | 1.54(6)                       |
| Bi/Sr1 | 4 <i>e</i> | 0        | 0        | Bi: 0.07170(8)<br>Sr: 0.080(6)  | Bi: 0.972(2)<br>Sr: 0.028(2)  | 1.76(4)                       |
| Cl2    | 4 <i>e</i> | 0        | 0        | 0.2100(3)                       | 1                             | 1.1(13)                       |
| Cl1    | 2 <i>b</i> | 0        | 0        | 1/2                             | 1                             | 1.1(13)                       |
| O1     | 8 <i>g</i> | 0        | 1/2      | 0.1114(5)                       | 1                             | 1.1(13)                       |

<sup>a</sup>Space group *I4/mmm* (#139), tetragonal,  $a = b = 3.93319(4)$  Å,  $c = 27.0186(6)$  Å,  $V = 417.98(11)$  Å<sup>3</sup>.

**Table S2** Bond valence sum of Bi and Sr in Bi/Sr1 and Bi/Sr2 sites.

| Atom         | Bond valence sum |
|--------------|------------------|
| Bi in Bi/Sr1 | 3.03             |
| Bi in Bi/Sr2 | 2.88             |
| Sr in Bi/Sr1 | 3.93             |
| Sr in Bi/Sr2 | 2.41             |

**Table S3** Rate constants and lifetimes obtained from the fitting of the TRMC kinetics (Figure S16). The effective lifetime ( $\tau_{\text{eff}}$ ) was calculated using  $\tau_{\text{eff}} = (A_1 + A_2)(A_1k_1 + A_2k_2)^{-1}$ . The maximum signal intensity of TRMC transients (Figure 8) ( $\varphi\Sigma\mu_{\text{max}}$ ) and the product of  $\varphi\Sigma\mu_{\text{max}}$  and  $\tau_{\text{eff}}$  ( $\varphi\Sigma\mu_{\text{max}}\times\tau_{\text{eff}}$ ) are also listed.

|                                                                                          | SrBi <sub>3</sub> O <sub>4</sub> Cl <sub>3</sub> | BiOCl                | SrBiO <sub>2</sub> Cl |
|------------------------------------------------------------------------------------------|--------------------------------------------------|----------------------|-----------------------|
| $k_1$ (s <sup>-1</sup> )                                                                 | $2.3\times 10^6$                                 | $1.7\times 10^7$     | $1.9\times 10^6$      |
| $k_2$ (s <sup>-1</sup> )                                                                 | $4.7\times 10^4$                                 | $1.1\times 10^5$     | $4.0\times 10^4$      |
| $\tau_{\text{eff}}$ (s)                                                                  | $1.1\times 10^{-5}$                              | $6.0\times 10^{-7}$  | $1.1\times 10^{-5}$   |
| $\varphi\Sigma\mu_{\text{max}}$ (m <sup>2</sup> V <sup>-1</sup> s <sup>-1</sup> )        | $4.1\times 10^{-7}$                              | $2.7\times 10^{-7}$  | $1.9\times 10^{-8}$   |
| $\varphi\Sigma\mu_{\text{max}}\times\tau_{\text{eff}}$ (m <sup>2</sup> V <sup>-1</sup> ) | $4.5\times 10^{-12}$                             | $1.6\times 10^{-13}$ | $2.1\times 10^{-13}$  |

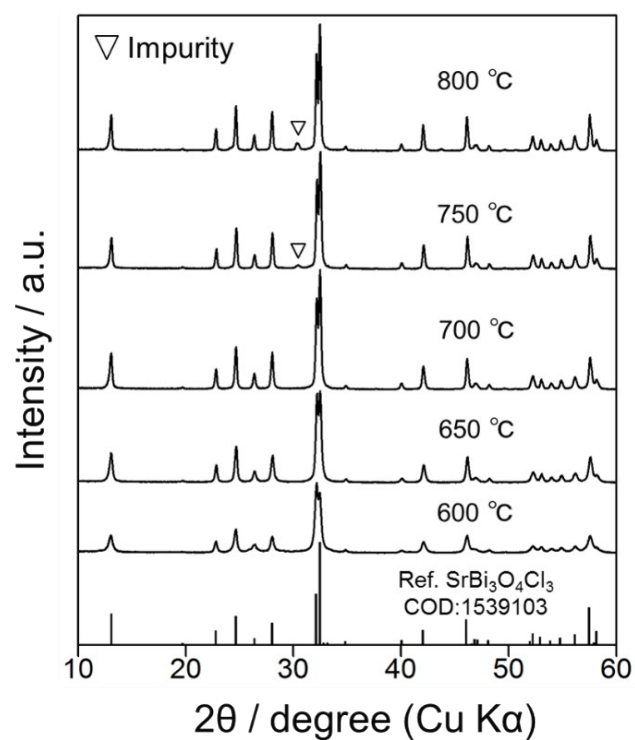

**Figure S1** XRD patterns of SrBi<sub>3</sub>O<sub>4</sub>Cl<sub>3</sub> samples prepared at 600–800 °C. The SrBi<sub>3</sub>O<sub>4</sub>Cl<sub>3</sub> sample prepared at 700 °C was used in the present study.

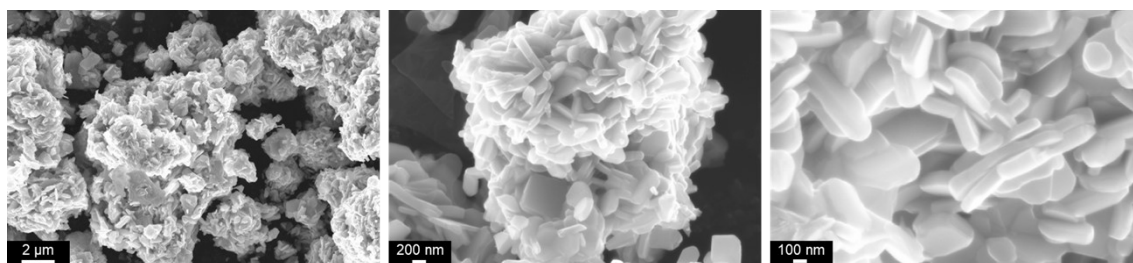

**Figure S2** SEM images of the SrBi<sub>3</sub>O<sub>4</sub>Cl<sub>3</sub> sample prepared at 700 °C.

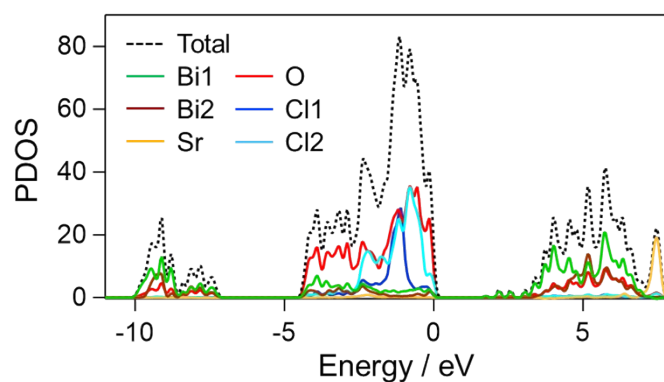

**Figure S3** DOS and PDOS of SrBi<sub>3</sub>O<sub>4</sub>Cl<sub>3</sub> calculated using the Quantum Espresso package.

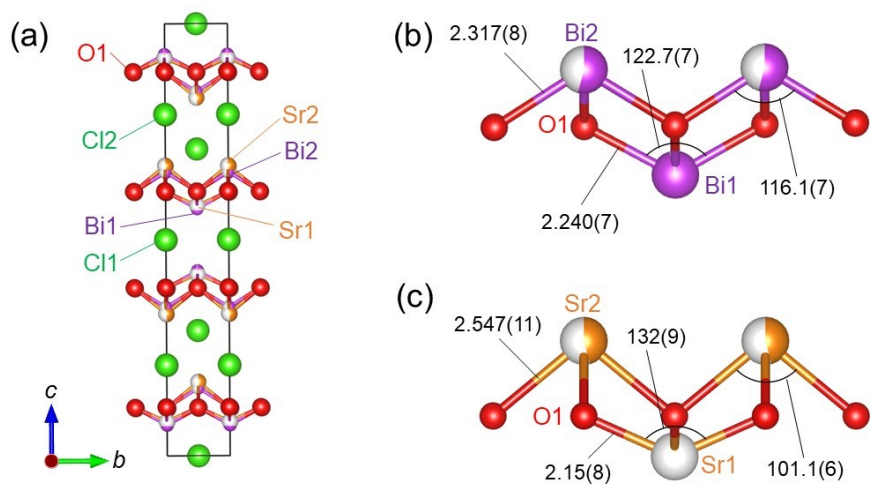

**Figure S4** (a) Refined crystal structure of  $\text{SrBi}_3\text{O}_4\text{Cl}_3$ , and coordination environments around (b) Bi1 and Bi2, and (c) Sr1 and Sr2 (in Å and degree).

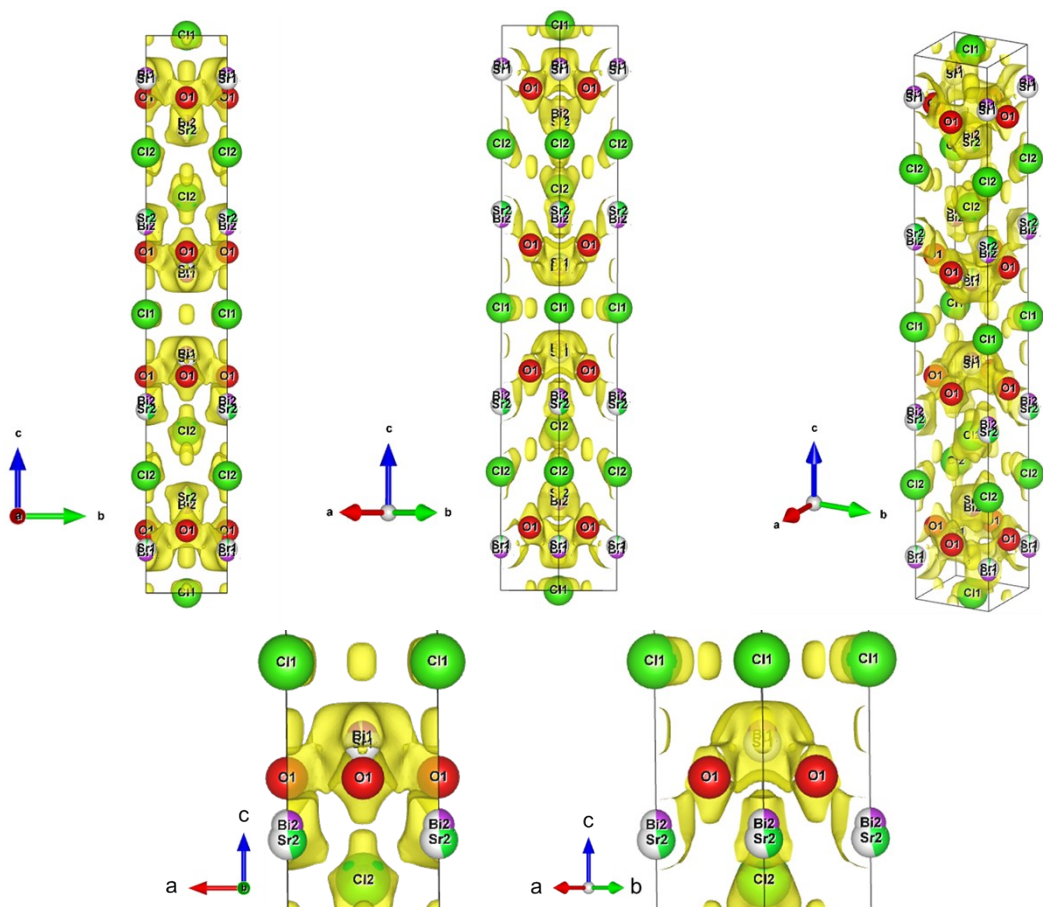

**Figure S5** Electron density distribution of  $\text{SrBi}_3\text{O}_4\text{Cl}_3$  obtained by MEM analysis (isosurface:  $0.55 \text{ \AA}^{-3}$ ).

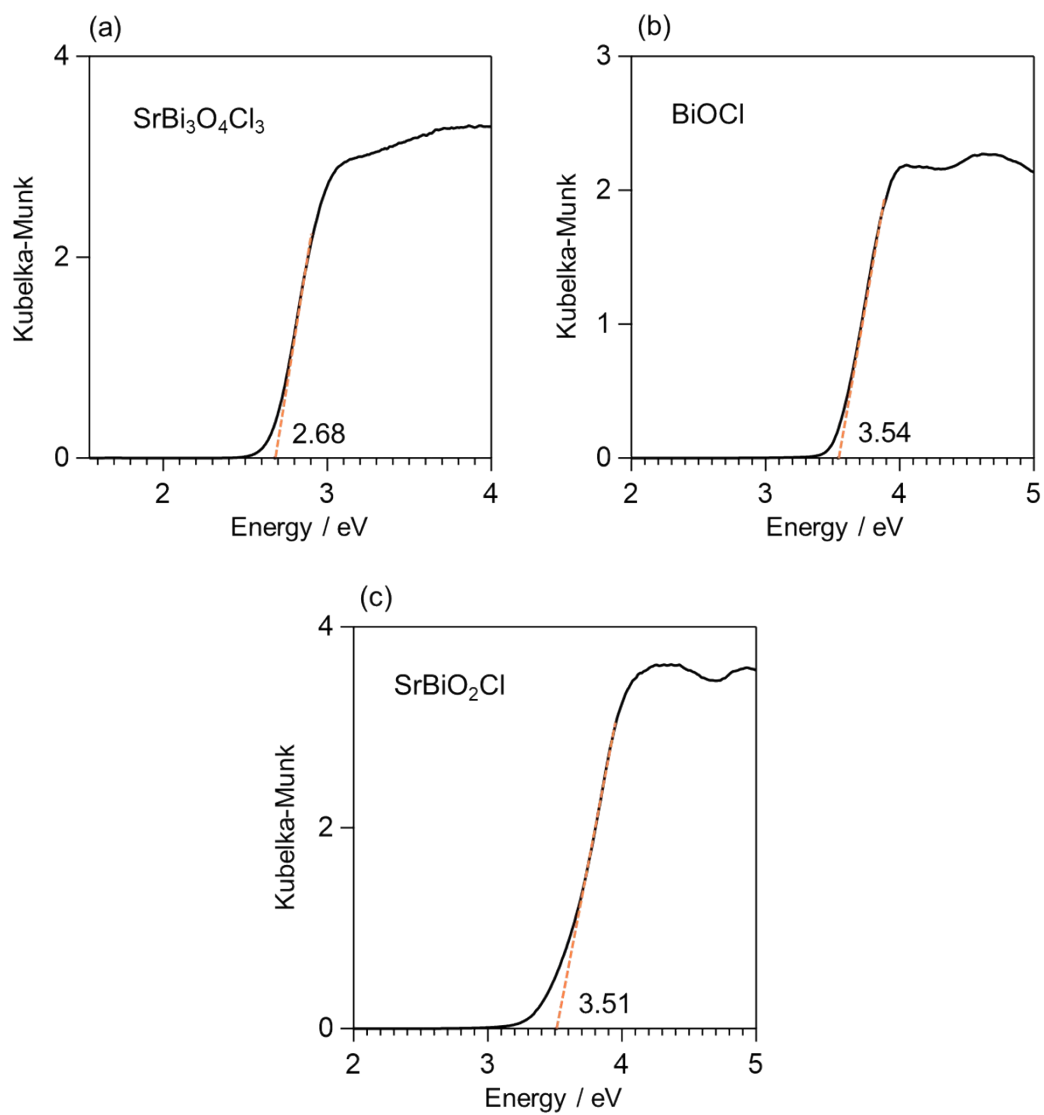

**Figure S6** Determination of bandgaps of (a)  $\text{SrBi}_3\text{O}_4\text{Cl}_3$ , (b)  $\text{BiOCl}$ , and (c)  $\text{SrBiO}_2\text{Cl}$

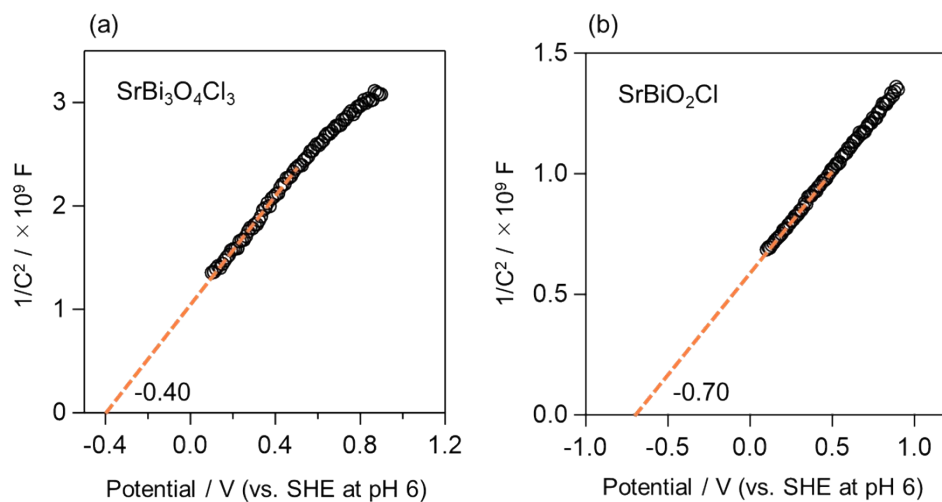

**Figure S7** Mott-Schottky plots for (a) SrBi<sub>3</sub>O<sub>4</sub>Cl<sub>3</sub> and (b) SrBiO<sub>2</sub>Cl.

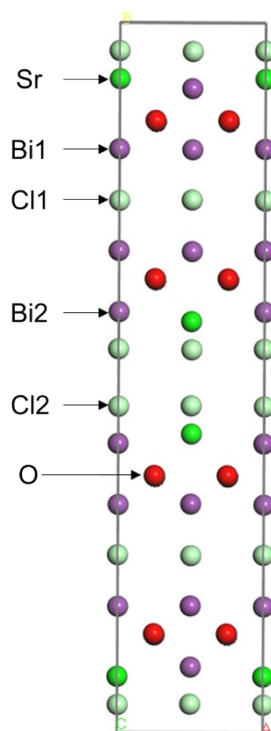

**Figure S8** Structure of SrBi<sub>3</sub>O<sub>4</sub>Cl<sub>3</sub> with  $\sqrt{2} \times \sqrt{2} \times 1$  supercell used for DFT calculation.

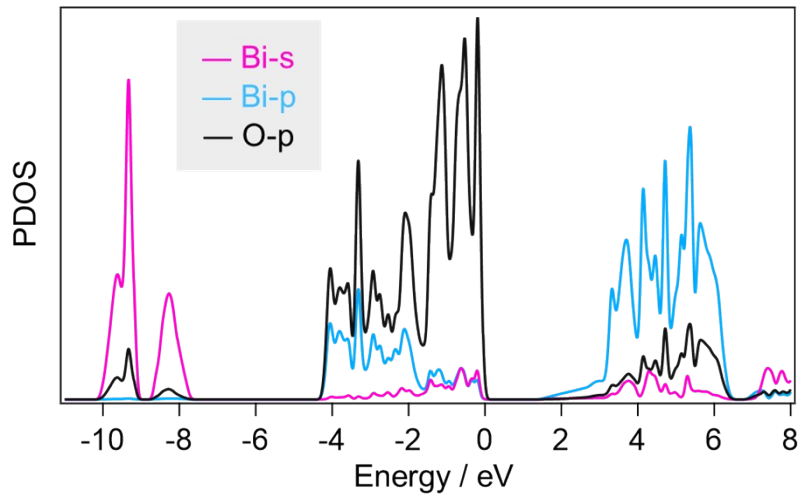

**Figure S9** PDOS of  $\text{SrBi}_3\text{O}_4\text{Cl}_3$  for 6s and 6p orbitals of Bi, along with that of O.

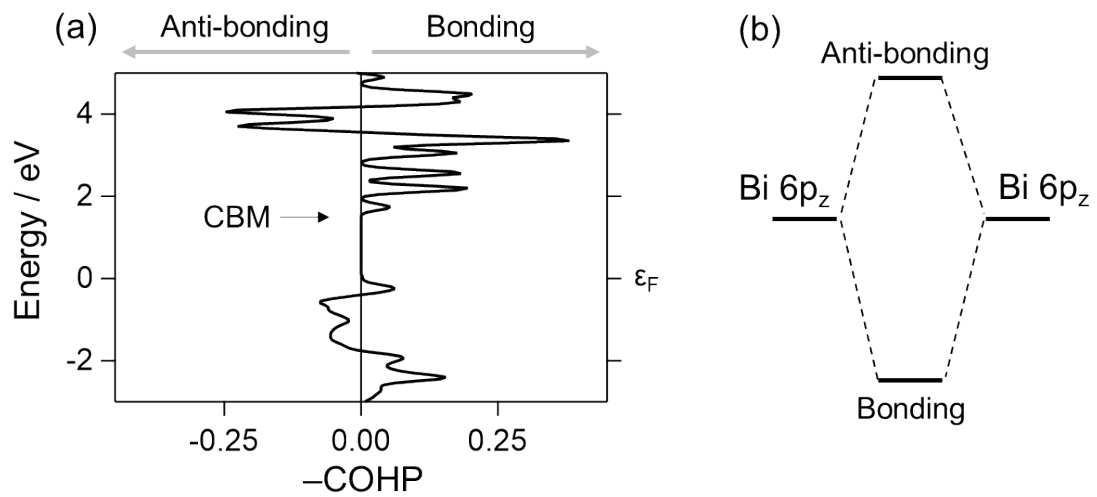

**Figure S10** (a) COHP for the interaction of Bi 6p<sub>z</sub>-Bi 6p<sub>z</sub>. (b) Schematic image of the interaction.

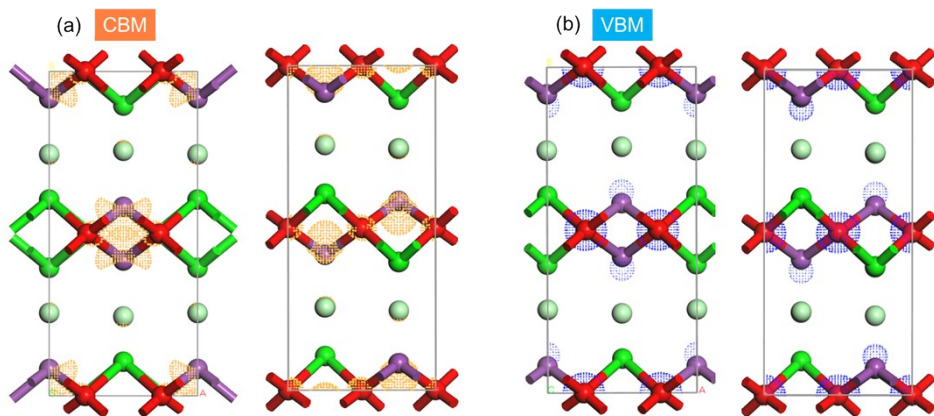

**Figure S11** Orbital distributions of the CBM (orange) and VBM (blue) of  $\text{SrBiO}_2\text{Cl}$  estimated by DFT calculations (Isosurface value:  $0.02 \text{ e}/\text{\AA}^3$ ), which are viewed from two different directions.

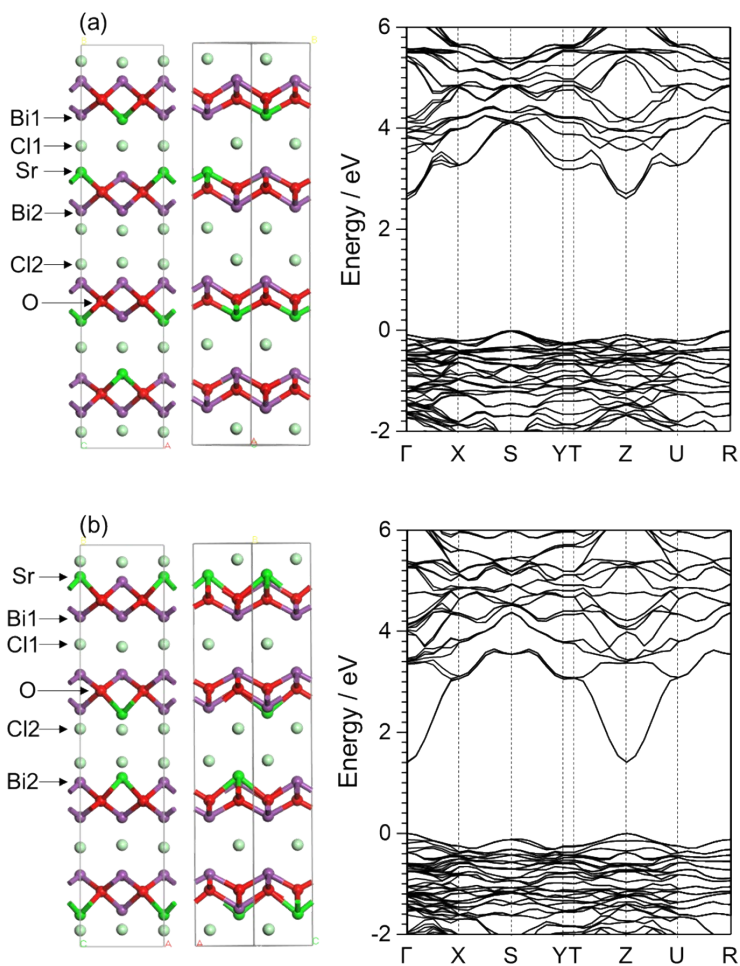

**Figure S12** Band structure of the two models: (a) one with Bi/Sr1 site occupied by  $\text{Bi}^{3+}$  and  $\text{Sr}^{2+}$  (b) the other with Bi/Sr1 site fully occupied by  $\text{Bi}^{3+}$ .



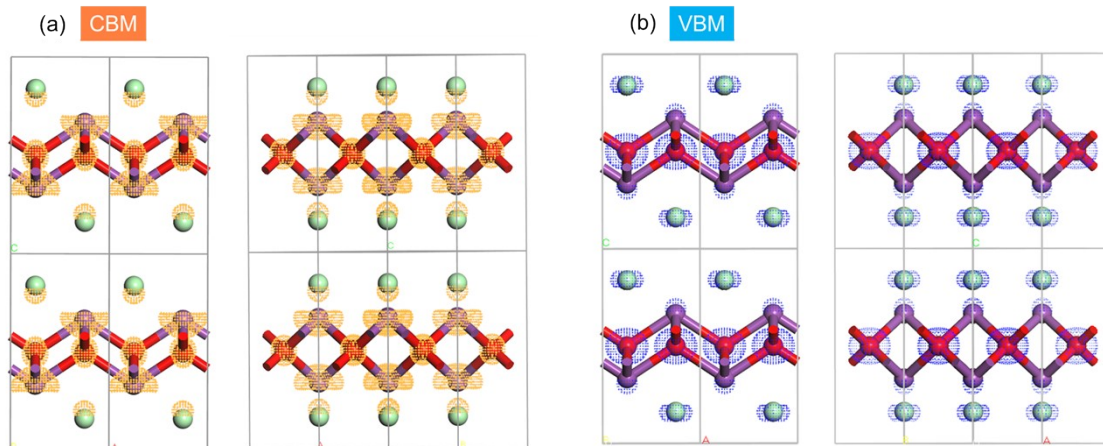

**Figure S13** Orbital distributions of the CBM (orange) and VBM (blue) of BiOCl estimated by DFT calculations (Isosurface value:  $0.06 \text{ e}/\text{\AA}^3$ ), which are viewed from two different directions.

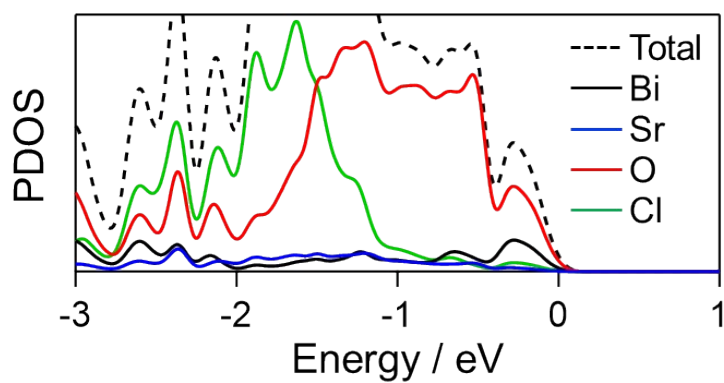

**Figure S14** Valence band structure of SrBiO<sub>2</sub>Cl reproduced from the reference.<sup>S1</sup>

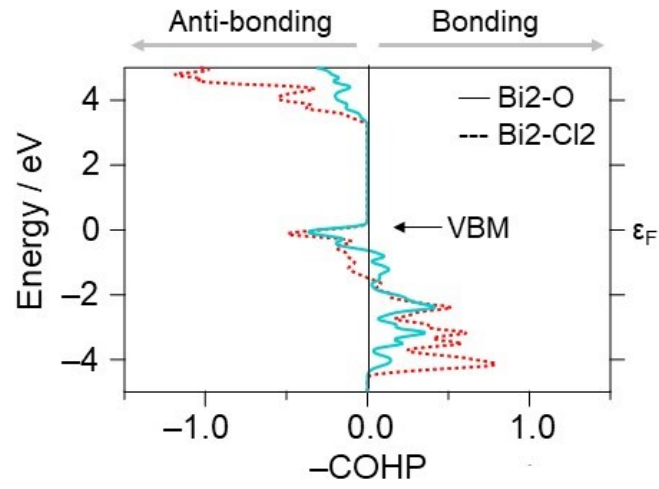

**Figure S15** COHP for the interaction of Bi2-O and Bi2-Cl2.

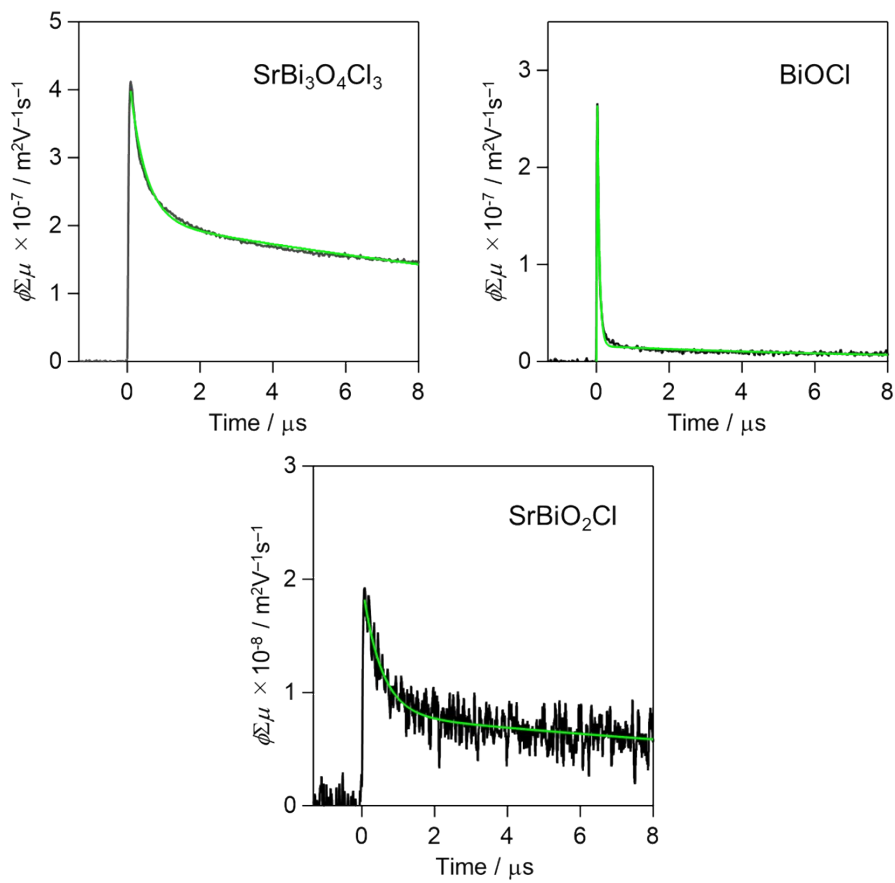

**Figure S16** Fitting of the TRMC kinetics of SrBi<sub>3</sub>O<sub>4</sub>Cl<sub>3</sub>, BiOCl, and SrBiO<sub>2</sub>Cl using biexponential function ( $A_1\exp(-k_1t) + A_2\exp(-k_2t)$ ) (the solid green line).

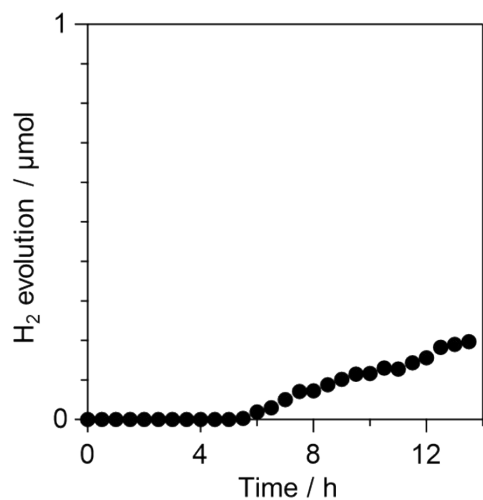

**Figure S17** Time course of photocatalytic H<sub>2</sub> evolution on SrBi<sub>3</sub>O<sub>4</sub>Cl<sub>3</sub> (100 mg) with in situ photodeposition of a Pt cocatalyst (1 wt%) under UV-vis light ( $300 < \lambda < 500$  nm) from an aqueous methanol solution (10 vol%, 120 mL).

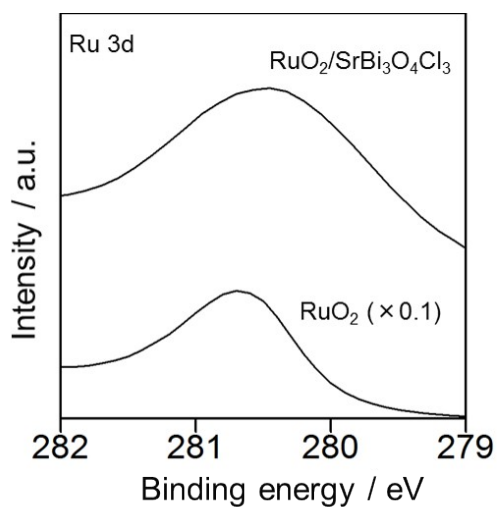

**Figure S18** XPS spectrum of RuO<sub>2</sub>/SrBi<sub>3</sub>O<sub>4</sub>Cl<sub>3</sub> in the Ru 3d region.

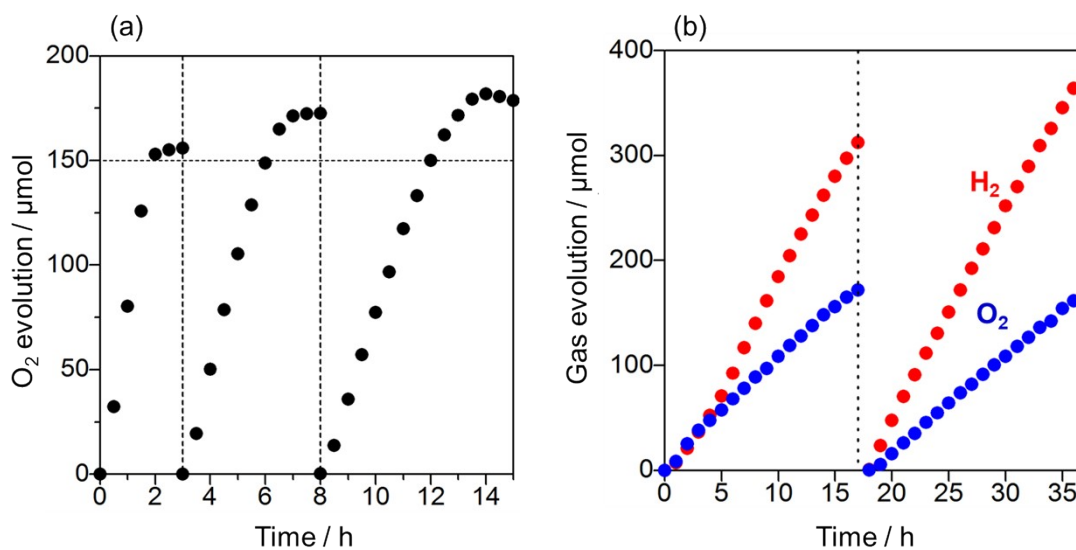

**Figure S19** (a) Time courses of photocatalytic O<sub>2</sub> evolution on RuO<sub>2</sub>/SrBi<sub>3</sub>O<sub>4</sub>Cl<sub>3</sub> (100 mg) under visible light ( $400 < \lambda < 800$  nm) from an aqueous solution of FeCl<sub>3</sub> (5 mM as Fe<sup>3+</sup>, 120 mL, pH 2.4 adjusted by HCl). An excess of O<sub>2</sub> over the stoichiometric amount estimated from the amount of introduced Fe<sup>3+</sup> (150  $\mu$ mol) was observed in the case of FeCl<sub>3</sub>. The decomposition of SrBi<sub>3</sub>O<sub>4</sub>Cl<sub>3</sub> and the formation of BiOCl may be related to the excess amount of O<sub>2</sub>. (b) Z-scheme overall water splitting using RuO<sub>2</sub>/SrBi<sub>3</sub>O<sub>4</sub>Cl<sub>3</sub> (50 mg) as O<sub>2</sub>-evolving photocatalyst and Ru/SrTiO<sub>3</sub>:Rh (50 mg) as H<sub>2</sub>-evolving photocatalyst under visible light ( $400 < \lambda < 800$  nm) in an aqueous FeCl<sub>3</sub> solution (2 mM as Fe<sup>3+</sup>, 120 mL, pH 2.4).

#### Reference

S1 H. Suzuki, H. Kunioku, M. Higashi, O. Tomita, D. Kato, H. Kageyama and R. Abe, *Chem. Mater.*, 2018, **30**, 5862-5869.
